# Supplementary material for: Structure-Guided Approach to Identify Potential Inhibitors of Large Envelope Protein to Prevent Hepatitis B Virus Infection
Source: Hindawi journal article supplement (doi:10.1155/2019/1297484), 2019-09-04
Supplement: f1 [file 1297484.f1.pdf]

## Supplementary files

**Fig. S1:** Diagrammatic representation of Structure-guided approach to design potential inhibitors of LHBs protein.

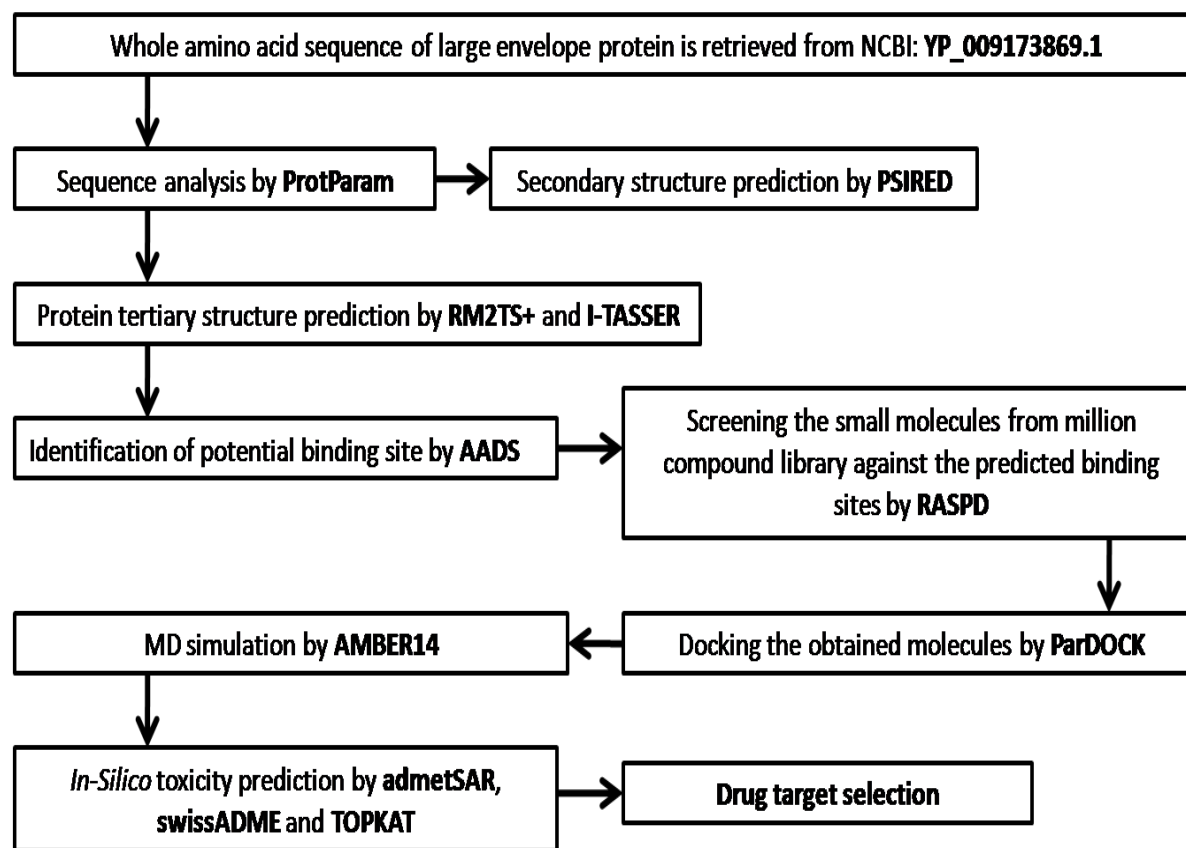

**Fig. S2:** Distribution of  $\alpha$ -helix (pink),  $\beta$ -sheet (yellow) and coil (black) in the LHBs protein

```
1 M G Q N L S T S N P L G F F P D H Q L D P A F R A N T A N P D W D F N P N K D T W P D A N K V G A G 50
51 A F G L G F T P P H G G L L G W S P Q A Q G I L Q T L P A N P P P A S T N R Q S G R Q P T P L S P P 100
101 L R N T H P Q A M Q W N S T T F H Q T L Q D P R V R G L Y F P A G G S S S G T V N P V L T T A S P L 150
151 S S I F S R I G D P A L N M E N I T S G F L G P L L V L Q A G F F L L T R I L T I P Q S L D S W W T 200
201 S L N F L G G T T V C L G Q N S Q S P T S N H S P T S C P P T C P G Y R W M C L R R F I I F L F I L 250
251 L L C L I F L L V L L D Y Q G M L P V C P L I P G S S T T S T G P C R T C M T T A Q G T S M Y P S C 300
301 C C T K P S D G N C T C I P I P S S W A F G K F L W E W A S A R F S W L S L L V P F V Q W F V G L S 350
351 P T V W L S V I W M M W Y W G P S L Y S I L S P F L P L L P I F F C L W V Y I
```

**Fig S3:** The structures which were obtained from RM2TS+ and I-TASSER were further analyzed using various tools such as ProtSAV, Protein Structure Analysis and Validation, but for getting better structure the MD was run for 20 ns.

• **LHBs structure before MD**

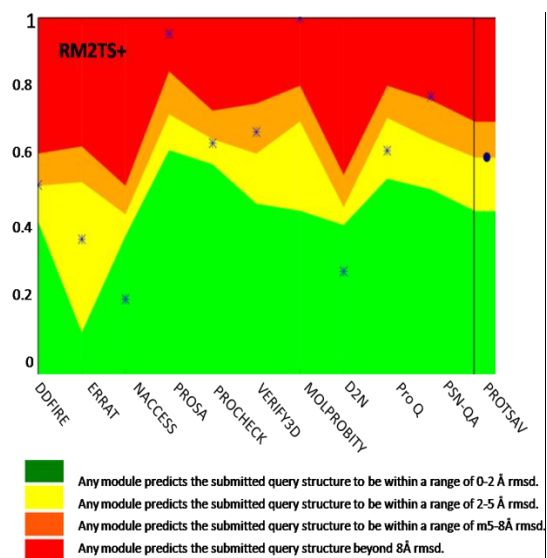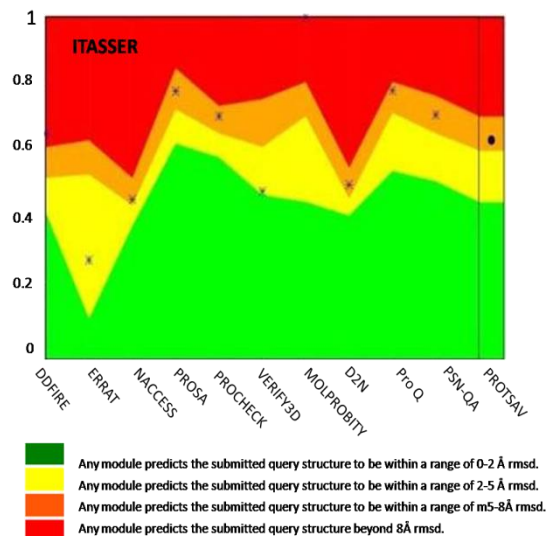

• **LHBs structure after MD**

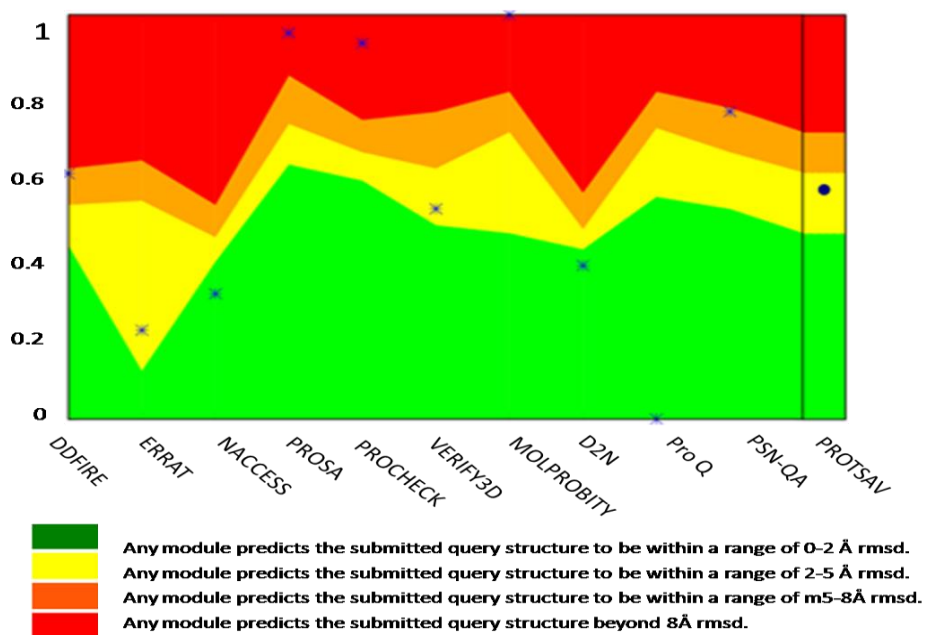

**Table S1:** Physiological properties of LHBs protein.

| Protein | Molecular wt.(Da) | Theoretical pI | Estimated half-life | Instability index | Aliphatic index | No. of amino acid | No. of atoms | GRAVY |
|---------|-------------------|----------------|---------------------|-------------------|-----------------|-------------------|--------------|-------|
| LHBs    | 42766.45          | 8.40           | 30hrs               | 46.08             | 82.24           | 389               | 5967         | 0.146 |

**Table S2:** 2D structure of identified ligands from ZINC database

| No | ZINC ID  | ParDock ID | 2D Structure of Ligand |
|----|----------|------------|------------------------|
| 1  | 11882026 | 33625775   |                        |

|   |          |          |  |
|---|----------|----------|--|
| 2 | 653293   | 21425236 |  |
| 3 | 19741044 | 72860345 |  |
| 4 | 15000762 | 78876711 |  |
| 5 | 11784805 | 34135187 |  |
| 6 | 12243260 | 32993271 |  |

**Table S3:** Comparative analysis of hydrogen bonds in LHBs and four ligands.

| NO | ZINC ID  | Receptor atom (LHBs)                           | Ligand atom       | No. of H bonds | Bonding Length (Å)   |
|----|----------|------------------------------------------------|-------------------|----------------|----------------------|
| 1  | 11882026 | Ala (51) [O]<br>Trp (111) [O]<br>Thr (104) [O] | [N]<br>[N]<br>[O] | 3              | 3.33<br>3.08<br>3.32 |
| 2  | 653293   | Pro (106) [O]<br>Ala (108) [N]                 | [N]<br>[N]        | 2              | 2.9<br>3.2           |
| 3  | 19741044 | Ser (90) [N]                                   | [O]               | 1              | 3.20                 |
| 4  | 15000762 | Ser (280) [N]                                  | [O]               | 1              | 2.89                 |

**Table S4:** Computationally predicted ADME properties of the identified compounds 1-5 by admetSAR and SwissADME. NS: (Non- Substrate); S: (Substrate); NI: (Non-Inhibitor); NT: (Non-Toxicity); NC: (Non-Carcinogen); NR: (Non-required)

| Descriptor                  | ZINC11882026 | ZINC00653293 | ZINC19741044 | ZINC15000762 |
|-----------------------------|--------------|--------------|--------------|--------------|
| <b>Absorption</b>           |              |              |              |              |
| Blood-Brain Barrier         | BBB+         | BBB+         | BBB+         | BBB+         |
| Human Intestinal Absorption | HIA+         | HIA+         | HIA+         | HIA+         |
| GI - absorption             | High         | High         | High         | High         |
| Caco-2 permeability         | Caco2+       | Caco2+       | Caco2+       | Caco2+       |
| <b>Metabolism</b>           |              |              |              |              |
| CYP4502C9 Substrate         | NS           | NS           | NS           | NS           |
| CYP4502D6 Substrate         | S            | NS           | NS           | NS           |
| CYP4503A4 Substrate         | S            | S            | S            | S            |
| CYP4501A2 Inhibitor         | NI           | NI           | NI           | NI           |

|                                                  |     |     |     |     |
|--------------------------------------------------|-----|-----|-----|-----|
| CYP4502C9 Inhibitor                              | NI  | I   | I   | I   |
| CYP4502D6 Inhibitor                              | NI  | I   | NI  | NI  |
| CYP4502C19 Inhibitor                             | I   | I   | I   | NI  |
| CYP4503A4 Inhibitor                              | NI  | I   | NI  | NI  |
| <b>Toxicity</b>                                  |     |     |     |     |
| AMES Toxicity                                    | NT  | NT  | NT  | NT  |
| Carcinogens                                      | NC  | NC  | NC  | NC  |
| Carcinogenicity (Three-class)                    | NR  | NR  | NR  | NR  |
| <b>Number of drug likeliness rules followed*</b> |     |     |     |     |
| Lipinski                                         | Yes | Yes | Yes | Yes |
| Ghose                                            | No  | No  | No  | Yes |
| Veber                                            | Yes | Yes | Yes | Yes |
| Egan                                             | Yes | Yes | Yes | Yes |
| Muegge                                           | No  | Yes | Yes | Yes |

**Table S5:** TOPKAT values of the identified compounds. NM: (Non-Mutagen); NC: (Non-Carcinogen); C: (Carcinogen); NI: (Non-irritant); NS: (Non-Sensitive); S: (Sensitive)

| <b>Descriptor</b>                                     | ZINC11882026 | ZINC00653293 | ZINC19741044 | ZINC15000762 |
|-------------------------------------------------------|--------------|--------------|--------------|--------------|
| Ames Mutagenicity (v3.1)                              | NM (0.853)   | NM (0.000)   | NM (0.000)   | NM (0.717)   |
| Weight of Evidence Carcinogenicity Call (v5.1)- (WOE) | NC (0.000)   | NC (0.394)   | C (1.000)    | NC (0.003)   |
| Rat Oral LD50 (v3.1)                                  | 2.432        | 3.946        | 4.559        | 2.895        |
| Skin Irritation (v6.1)                                | NI (0.000)   | NI (0.000)   | NI (0.000)   | NI (0.000)   |
| Skin Sensitization NEG v SENS (v6.1)                  | NS (0.493)   | NS (0.000)   | NS (0.088)   | NS (0.000)   |
| Aerobic Biodegradability (v6.1)                       | No           | Yes          | No           | Yes          |
